# Supplementary material for: The Dynamics of Diverse Segmental Amplifications in Populations ofSaccharomyces cerevisiaeAdapting to Strong Selection
Source: Oxford University Press journal article supplement (doi:10.1534/g3.113.009365), 2013-12-27
Supplement: 009365_figures5.pdf [file 009365_figures5.pdf]

Supplementary Figure 5: aCGH of Pop3 201 clone10

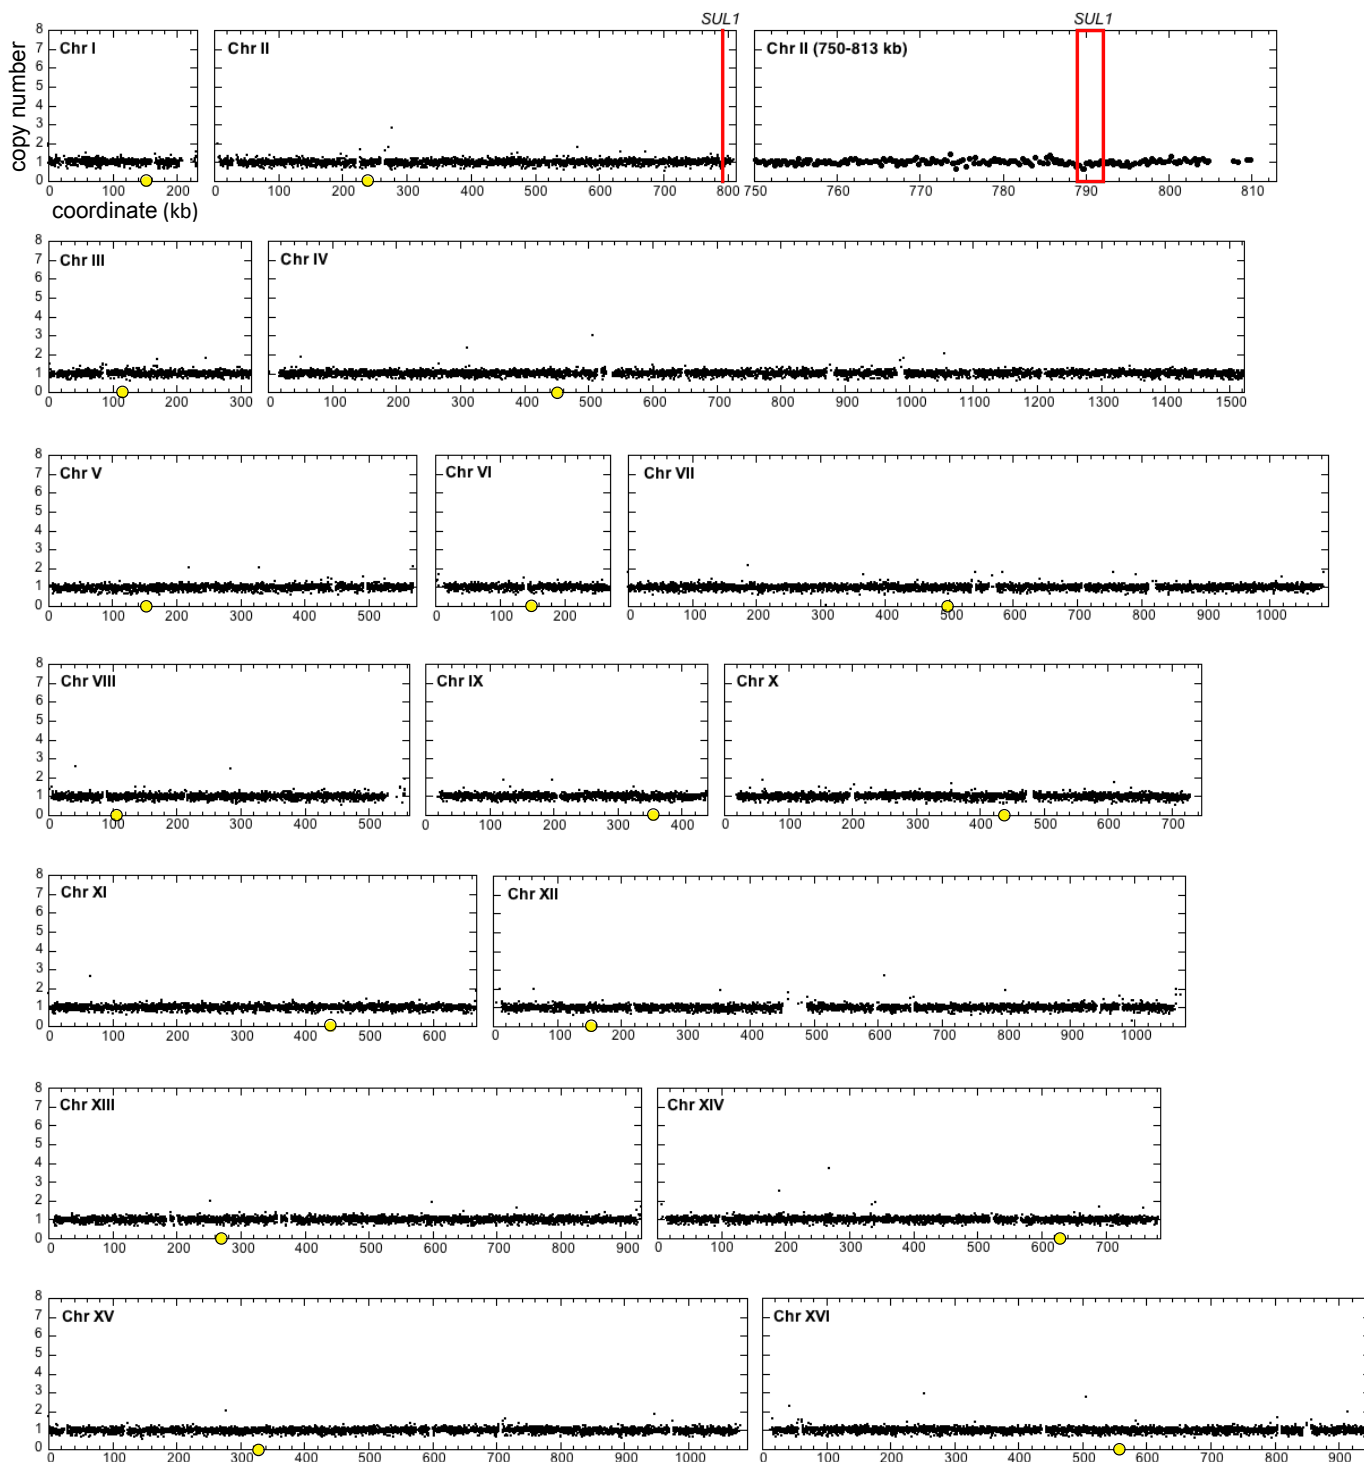

**Figure S5 Whole genome copy number data from aCGH of Pop3 210 clone10.** Copy number of each probe across the genome is shown for Pop3 210 clone10. An expanded view of the last ~60 kb of chromosome II is shown to provide higher resolution for the genomic region that contains the *SUL1* locus. No amplification at the *SUL1* locus or any other location of the genome was detected for this clone.
