# Supplementary material for: The Dynamics of Diverse Segmental Amplifications in Populations ofSaccharomyces cerevisiaeAdapting to Strong Selection
Source: Oxford University Press journal article supplement (doi:10.1534/g3.113.009365), 2013-12-27
Supplement: 009365_tables1.xlsx [file 009365_tables1.xlsx]

## Sheet: SuppTable1
Pop2 generation 54				Pop2 generation 210				Pop3 generation 54				Pop3 generation 210				Pop4 generation 52				Pop4 generation 210				Pop5 generation 53				Pop5 generation 209				Pop6 generation 54				Pop6 generation 211				Pop7 generation 52				Pop7 generation 201
Clone	Total STD	SUL1 CN		Clone	Total STD	SUL1 CN		Clone	Total STD	SUL1 CN		Clone	Total STD	SUL1 CN		Clone	Total STD	SUL1 CN		Clone	Total STD	SUL1 CN		Clone	Total STD	SUL1 CN		Clone	Total STD	SUL1 CN		Clone	Total STD	SUL1 CN		Clone	Total STD	SUL1 CN		Clone	Total STD	SUL1 CN		Clone	Total STD	SUL1 CN
1	0.0321173	0.990137		1	0.0664207	3.07		1	0.0217426	3.54151		1	0.0165043	6.77822		1	0.0763241	0.988314		1	0.0996758	0.971653		1	0.0688346	1.07464		1	0.104446	0.754814		1	0.111521	0.897976		1	0.0504086	1.04537		1	0.068403	3.13074		1	0.0963021	3.09734
2	0.122263	0.952003		2	0.159763	3.69		2	0.0267783	3.30537		2	0.0216339	5.10646		2	0.0409889	1.00297		2	0.14044	1.56695		2	0.0597534	0.899305		2	0.129181	0.850843		2	0.0396601	2.74638		2	0.144221	1.05107		2	0.0422263	1.46384		2	0.0983648	3.53039
3	0.0410195	1.02755		3	0.0473815	4.21		3	0.0318755	3.84778		3	0.0241793	1.07162		3	0.0573653	1.00477		3	0.133939	1.74129		3	0.0563979	0.972331		3	0.0145288	0.891481		3	0.0402115	0.90267		3	0.135037	2.05924		3	0.052251	3.16456		3	0.0375051	4.65102
4	0.0223434	0.980881		4	0.0440879	4.24		4	0.0363868	3.75901		4	0.0259658	1.22198		4	0.084782	1.01421		4	0.0711792	2.07098		4	0.0502387	1.00351		4	0.0683782	0.940092		4	0.0163176	1.85434		4	0.137721	2.06959		4	0.0841635	2.94662		4	0.0710347	4.80743
5	0.0531948	0.936869		5	0.15817	4.54		5	0.0365063	3.35		5	0.0325981	3.49622		5	0.0678181	1.01639		5	0.180777	2.25009		5	0.0747294	0.914115		5	0.0167351	1.54276		5	0.0400879	0.918501		5	0.0313238	2.83209		5	0.0535243	3.15159		5	0.111738	4.85831
6	0.0340898	0.918566		6	0.0434354	4.82		6	0.0389744	3.54526		6	0.0365812	6.28211		6	0.0504217	1.01934		6	0.179482	2.33657		6	0.150861	1.01505		6	0.0472471	1.72684		6	0.0395614	2.82976		6	0.0752114	3.00363		6	0.137255	2.99349		6	0.0347146	4.91423
7	0.0485688	0.998919		7	0.202999	4.82		7	0.0398716	3.8366		7	0.0417377	6.83531		7	0.0741609	1.01945		7	0.1851	2.42886		7	0.0473442	0.864838		7	0.132594	1.76295		7	0.0389833	0.922714		7	0.109132	3.11116		7	0.0439044	2.88786		7	0.0360818	4.98275
8	0.0451792	0.887881		8	0.0791091	4.86		8	0.0414159	3.35594		8	0.0459906	11.4964		8	0.0775453	1.02076		8	0.118373	2.48732		8	0.0471968	1.03105		8	0.0263212	1.86061		8	0.0686422	2.99915		8	0.0606667	3.11291		8	0.0705233	2.8699		8	0.0356407	4.99141
9	0.103726	0.960435		9	0.0619046	4.92		9	0.0414813	3.4738		9	0.046609	7.42841		9	0.0987205	1.03102		9	0.0332855	2.52848		9	0.122313	0.920515		9	0.120195	1.89873		9	0.110955	3.01652		9	0.115933	3.12288		9	0.0412276	2.69115		9	0.0135334	5.00098
10	0.0426548	0.943711		10	0.163531	4.96		10	0.0423695	3.84378		10	0.047639	6.92423		10	0.0803649	1.03436		10	0.120239	2.53353		10	0.103681	0.906201		10	0.0853357	2.05206		10	0.0332312	2.99101		10	0.0677006	3.23815		10	0.0288551	3.11475		10	0.0784386	5.09765
11	0.0315696	0.959784		11	0.0363338	5.03		11	0.043857	3.38457		11	0.0508356	1.37399		11	0.0786324	1.03486		11	0.0495537	2.54808		11	0.0461891	0.969089		11	0.0715947	2.18073		11	0.0562204	1.00009		11	0.0631793	3.47229		11	0.139311	3.01774		11	0.0800608	5.14263
12	0.0708228	0.975867		12	0.0258906	5.05		12	0.0452559	3.77846		12	0.0518415	13.5786		12	0.0927532	1.03571		12	0.148194	2.59401		12	0.147832	1.12092		12	0.128044	2.18894		12	0.0618142	1.87133		12	0.0368204	4.91726		12	0.191293	0.99593		12	0.0922747	5.19956
13	0.0404895	0.981496		13	0.0411112	5.07		13	0.0463723	3.45172		13	0.0537138	3.51225		13	0.0465718	1.04305		13	0.101105	2.72424		13	0.132576	1.10413		13	0.0684126	2.2671		13	0.0342031	1.89454		13	0.0313204	4.98015		13	0.0818982	2.43547		13	0.041947	5.20204
14	0.0609427	0.942475		14	0.0513764	5.08		14	0.0502514	3.20876		14	0.0593639	6.47853		14	0.116731	1.04559		14	0.113108	2.75506		14	0.124249	0.942029		14	0.090474	2.30924		14	0.0496459	0.924085		14	0.0228227	5.04133		14	0.0753815	2.56157		14	0.148805	5.22363
15	0.0649948	1.02815		15	0.0398877	5.17		15	0.0509552	3.33278		15	0.0629016	8.17246		15	0.0864796	1.04981		15	0.100526	2.75943		15	0.110655	1.03356		15	0.0794421	2.33359		15	0.0985984	0.871547		15	0.0304777	5.1925		15	0.114729	3.08271		15	0.163308	5.24341
16	0.0808696	0.855737		16	0.0173215	5.2		16	0.0531939	3.60706		16	0.0656795	5.95265		16	0.0547126	1.056		16	0.0925255	2.91021		16	0.113261	1.02296		16	0.0688683	2.35912		16	0.0586391	2.36321		16	0.0815182	5.20198		16	0.0380681	0.965324		16	0.03436	5.31263
17	0.0697808	0.872443		17	0.193178	5.25		17	0.0547767	3.45815		17	0.0659354	6.22928		17	0.0708898	1.06362		17	0.0834586	2.96906		17	0.116808	0.909381		17	0.1028	2.36812		17	0.0897079	2.55392		17	0.0476033	5.24215		17	0.042437	2.24037		17	0.0296298	5.31687
18	0.0385848	0.865661		18	0.022697	5.29		18	0.0556501	3.61959		18	0.0747132	11.5265		18	0.0499497	1.07619		18	0.10599	3.13616		18	0.082796	0.896588		18	0.0372625	2.37339		18	0.0531975	2.49974		18	0.103714	5.31995		18	0.0788085	2.62227		18	0.0816046	5.41586
19	0.0872934	0.942056		19	0.116333	5.29		19	0.0557853	3.3981		19	0.074848	1.6286		19	0.0609724	1.07767		19	0.0777305	3.37723		19	0.082803	0.842642		19	0.0644533	2.55987		19	0.0211358	2.47921		19	0.148295	5.43568		19	0.0592041	2.23491		19	0.0679821	5.42943
20	0.0462248	0.860788		20	0.0285596	5.32		20	0.0565889	3.51302		20	0.0751089	9.035		20	0.0882672	1.08318		20	0.122032	3.43697		20	0.045738	0.856299		20	0.195328	2.60425		20	0.0266088	2.63337		20	0.0830963	5.52297		20	0.0777639	2.52266		20	0.106121	5.43078
21	0.0320457	0.905861		21	0.0412142	5.34		21	0.0573729	6.17725		21	0.0758795	6.9439		21	0.0796677	1.08786		21	0.11828	3.53398		21	0.0383502	0.925263		21	0.0478438	2.62586		21	0.0614783	2.74266		21	0.0816004	5.5307		21	0.025821	0.888836		21	0.0506445	5.45856
22	0.0517983	0.926177		22	0.0690348	5.45		22	0.0583174	3.44024		22	0.0766128	15.4533		22	0.0810476	1.0931		22	0.104568	3.56189		22	0.0427083	0.906797		22	0.0765357	2.63992		22	0.0413488	2.58967		22	0.092489	5.56601		22	0.0569279	2.23871		22	0.12114	5.47707
23	0.0640674	0.944422		23	0.0403108	5.51		23	0.0591325	3.51582		23	0.0810957	8.86681		23	0.058344	1.095		23	0.0509347	3.56595		23	0.0413885	0.913153		23	0.0476424	2.71065		23	0.0349143	2.55793		23	0.0577893	5.58657		23	0.0285564	1.81817		23	0.168749	5.55212
24	0.0747364	0.898532		24	0.0937555	5.51		24	0.0598117	3.54315		24	0.0811094	6.49497		24	0.172478	1.1015		24	0.143957	3.71402		24	0.028576	0.878597		24	0.0558739	2.72654		24	0.0551623	2.81526		24	0.0469396	5.58801		24	0.0347618	2.73375		24	0.203454	5.74908
25	0.0982375	0.964488		25	0.0431543	5.55		25	0.060171	3.40551		25	0.0815764	1.21679		25	0.175814	1.1038		25	0.0330178	3.82432		25	0.0275079	0.901448		25	0.153606	2.73592		25	0.0291705	2.56867		25	0.186598	5.66588		25	0.0476559	2.43308		25	0.120081	5.7957
26	0.022531	0.912889		26	0.0639264	5.57		26	0.0601734	3.76959		26	0.0855184	14.05		26	0.114056	1.10897		26	0.150519	3.82734		26	0.091108	0.910006		26	0.151452	2.74539		26	0.0535189	2.68341		26	0.142314	5.75287		26	0.0200918	2.62153		26	0.179455	6.03496
27	0.0140601	0.92163		27	0.0643398	5.58		27	0.0602104	3.76758		27	0.0871912	6.7789		27	0.025579	1.28112		27	0.0539798	3.88144		27	0.0582028	0.895723		27	0.0947641	2.75939		27	0.0478489	2.55833		27	0.104467	5.79971		27	0.110655	2.13284		27	0.111101	6.3268
28	0.0706216	0.970252		28	0.0324055	5.59		28	0.0611631	3.44948		28	0.0881993	6.42624		28	0.0560312	1.29904		28	0.11168	3.90413		28	0.0203184	0.890136		28	0.0700797	2.76082		28	0.0619026	2.60508		28	0.0790936	6.07096		28	0.0932587	0.901762		28	0.0291697	7.37381
29	0.0860839	0.887652		29	0.0284399	5.6		29	0.062114	3.53138		29	0.0882533	7.32873		29	0.0444597	1.30202		29	0.134377	3.98014		29	0.119457	0.845859		29	0.0317535	2.76524		29	0.0455759	2.77168		29	0.117648	6.16871		29	0.0336937	0.851249			Average SUL1 CN	5.2363
30	0.0929208	0.90583		30	0.139401	5.87		30	0.0637062	3.61654		30	0.0900697	6.53168		30	0.121364	1.312		30	0.134346	4.13988		30	0.0804177	0.896657		30	0.0674107	4.63843		30	0.108742	2.64114		30	0.1389	6.26763		30	0.0532049	2.183			% w/ SUL1 Amp	1
31	0.107367	0.96227		31	0.0752715	5.91		31	0.0646071	3.61601		31	0.0913524	10.8132		31	0.196648	1.31782		31	0.0782677	4.26218		31	0.105372	0.864811		31	0.0366011	4.7265			Average SUL1 CN	2.19013		31	0.202065	8.44327		31	0.139768	2.38297
	Average SUL1 CN	0.93811		32	0.121574	5.94		32	0.065503	1.05894		32	0.092799	6.28117		32	0.0792291	1.32817		32	0.121035	4.55327			Average SUL1 CN	0.9396			Average SUL1 CN	2.31162			% w/ SUL1 Amp	0.766667			Average SUL1 CN	4.5617			Average SUL1 CN	2.33159
	% w/ SUL1 Amp	0		33	0.0226936	5.96		33	0.0674065	1.08174		33	0.0929591	7.9442		33	0.0955482	1.3388		33	0.19617	4.59374			% w/ SUL1 Amp	0			% w/ SUL1 Amp	0.870968							% w/ SUL1 Amp	0.935484			% w/ SUL1 Amp	0.83871
				34	0.0865786	6.77		34	0.0676627	3.33217		34	0.093449	1.26191		34	0.0317918	1.34885		34	0.158561	4.73364
				35	0.0859137	7.07		35	0.0690657	3.48461		35	0.0965699	6.90562		35	0.0338987	1.34935		35	0.128898	4.85892
					Average SUL1 CN	5.23143		36	0.0702694	3.38469		36	0.103655	10.8068		36	0.100741	1.36906		36	0.0347379	4.98995
					% w/ SUL1 Amp	1		37	0.0703462	3.42931		37	0.104136	13.3618		37	0.0794455	1.37212		37	0.184407	5.05812
								38	0.0706217	3.62019		38	0.105331	1.07845		38	0.0598259	1.40545		38	0.0888168	5.15961
								39	0.0719296	3.33907		39	0.105468	13.6837		39	0.0863308	1.71678		39	0.0895143	5.40057
								40	0.0773366	3.63036		40	0.106151	10.4182		40	0.0337681	1.97179		40	0.0537244	5.54239
								41	0.0889143	3.43281		41	0.106982	10.4096		41	0.0621118	1.99488		41	0.165176	5.55546
								42	0.0949333	3.19961		42	0.107151	8.23279		42	0.0882999	2.05739		42	0.0975916	5.56163
								43	0.0968837	4.68681		43	0.10742	10.7973		43	0.152833	2.2535		43	0.0553484	5.64331
								44	0.0985765	3.40562		44	0.108188	16.0667		44	0.0644697	2.31763		44	0.041477	5.64919
								45	0.10382	3.50683		45	0.110219	1.30307		45	0.0477802	2.31832		45	0.0724112	5.70268
								46	0.111284	3.20181		46	0.112924	1.53539		46	0.0975282	2.36273		46	0.0379846	5.71717
								47	0.111634	3.69343		47	0.113289	6.25355		47	0.0392645	2.98596		47	0.154093	5.71751
								48	0.113535	3.26131		48	0.11396	11.3173		48	0.0691953	3.24897		48	0.0291884	5.89904
								49	0.119428	3.5599		49	0.119271	11.7671			Average SUL1 CN	1.38665		49	0.0770107	5.97697
								50	0.123601	3.51847		50	0.121263	8.78454			% w/ SUL1 Amp	0.208333		50	0.0523909	6.00023
								51	0.137094	4.16947		51	0.125316	1.44369						51	0.0486025	6.07143
								52	0.145182	3.74753		52	0.126009	6.517						52	0.0861528	6.23466
								53	0.151274	3.5963		53	0.12892	8.10387						53	0.121167	6.29246
								54	0.158146	3.87999		54	0.129232	14.9974						54	0.111492	6.89192
								55	0.158445	3.44194		55	0.130009	1.08227						55	0.0559979	6.97158
								56	0.160291	4.40189		56	0.13066	1.37575						56	0.0884834	7.09684
								57	0.163628	3.66705		57	0.13179	9.12093						57	0.146986	7.71194
								58	0.170972	3.64429		58	0.133328	11.9832						58	0.0960199	8.98957
								59	0.177247	3.92044		59	0.13405	1.45836							Average SUL1 CN	4.32578
								60	0.179148	3.74765		60	0.136034	13.1036							% w/ SUL1 Amp	0.982759
								61	0.179934	3.55393		61	0.13762	1.10584
								62	0.183966	3.88755		62	0.13838	10.4831
								63	0.185915	5.35114		63	0.139719	8.42823
								64	0.19319	4.28363		64	0.142003	5.91712
								65	0.200076	3.21248		65	0.146138	1.46338
								66	0.201033	4.86587		66	0.153104	6.04924
								67	0.203703	4.41874		67	0.15669	12.8698
									Average SUL1 CN	3.61286		68	0.158981	8.06152
									% w/ SUL1 Amp	0.970149		69	0.163409	6.01975
												70	0.163748	2.84883
												71	0.171697	1.60838
												72	0.172329	11.7686
												73	0.17256	8.2343
												74	0.175464	9.0899
												75	0.177516	8.50971
												76	0.179306	10.9167
												77	0.182157	3.96411
												78	0.190239	1.05778
												79	0.190983	5.8438
												80	0.194476	1.12642
												81	0.195967	7.23442
												82	0.196158	16.3676
												83	0.197246	2.48589
												84	0.197684	1.55663
												85	0.202169	18.3565
													Average SUL1 CN	7.22113
													% w/ SUL1 Amp	0.823529
