# Supplementary material for: The Dynamics of Diverse Segmental Amplifications in Populations ofSaccharomyces cerevisiaeAdapting to Strong Selection
Source: Oxford University Press journal article supplement (doi:10.1534/g3.113.009365), 2013-12-27
Supplement: 009365_tables2.xlsx [file 009365_tables2.xlsx]

## Sheet: Sheet1
Supp Table 2
Pop 2 clone 1
chr	position	reference	alternate	AA change	indel-containing_region	gene
chrVII	785968	T	A		intergenic	NA
chrXIII	762077	A	G		intergenic	NA
chrXIII	805492	G	T	T311K	coding-nonsynonymous	YMR270C
chrXIII	324097	G	A	M266I	coding-nonsynonymous	YMR025W
chrXIII	508047	G	T	Q412K	coding-nonsynonymous	YMR120C
chrXVI	689715	C	T		intergenic	NA
Pop3 clone 10
chr	position	reference	alternate	AA change	indel-containing_region	gene
chrVII	377915	G	T	G103*	coding-nonsynonymous	YGL066W
chrVIII	562354	C	T		telomere	telomere
chrIX	215392	G	A	P188S	coding-nonsynonymous	YIL077C
Pop 3 clone 1
chr	position	reference	alternate	AA change	indel-containing_region	gene
chrX	141541	G	C	H343D	coding-nonsynonymous	YJL147C
chrXI	15	A	C		telomere	TEL11L
Pop 4 clone 1
chr	position	reference	alternate	AA change	indel-containing_region	gene
chrX	477686	A	G	S1642S	coding-synonymous	YJR027W
Pop 5 clone 1
chr	position	reference	alternate	AA change	indel-containing_region	gene
chrII	30050	A	G	N39S	coding-nonsynonymous	YBL100W-A
chrII	789984	C	A	N250K	coding-nonsynonymous	YBR294W
chrXII	5741	T	C	F46S	coding-nonsynonymous	YLL066W-B
Pop 6 clone 1
chr	position	reference	alternate	AA change	indel-containing_region	gene
chrVII	401674	C	A		intergenic	NA
Pop 7 clone 1
chr	position	reference	alternate	AA change	indel-containing_region	gene
chrVII	378757	C	G	Y383*	coding-nonsynonymous	YGL066W
chrVIII	394817	G	A	P615S	coding-nonsynonymous	YHR149C
chrXIV	636920	G	T		5'-upstream	YNR006W
chrXV	140332	T	A	Q339L	coding-nonsynonymous	YOL095C
Bold: mutation verified by Sanger-sequencing
