# Supplementary material for: The Dynamics of Diverse Segmental Amplifications in Populations ofSaccharomyces cerevisiaeAdapting to Strong Selection
Source: Oxford University Press journal article supplement (doi:10.1534/g3.113.009365), 2013-12-27
Supplement: 009365_tables3.xlsx [file 009365_tables3.xlsx]

## Sheet: Sheet1
		Primers names	Primers sequences	Chromosome	Coordinates
	Probes	SUL1-probe-for	GCTGATTTAGTGGCAGGAATT	2	789596	789616
		SUL1-probe-rev	GTAGTCGTTAATTCTACCAAAG	2	790489	790468
		CEN2-probe-for	CTATTTAGGTTCACTACACGAGCATTCATTGAG	2	237128	237160
		CEN2-probe-rev	CTGCACAGACACTTGTATCCTATACTATCAAG	2	238048	238017
		ARS305-probe-for	ATAACGGAGACTGGCGAACC	3	40414	40395
		ARS305-probe-rev	ATTCGCCTTTTGACAGGACG	3	39256	39275
		ARS501-probe-for	GCTCACACACCTCTTGCTGC	5	550942	550961
		ARS501-probe-rev	CGTTCTTATCTGGGCTATTGCGA	5	552560	552538
		probe786-rev	ATTATGGTAAAGTGTGGTGA	2	786002	786021
		probe786-for	CTGTGGATTTGCACACAATC	2	786599	786580
	qPCR	SUL1-L	GAATTGAATATCAATACCACAGTTCG	2	791110	791135
		SUL1-R	CCCAAACGATAGACTATGACACC	2	791171	791149
		ACT-L	TCCGTCTGGATTGGTGGT	6	53376	53359
		ACT-R	TGAGATCCACATTTGTTGGAAG	6	53314	53335
	PCR	SGF73-for-A	GGGACTCCTC AAACCTTCAG	7	378209	378228
		SGF73-rev-B	CTAGTGGCAGTGGGAAAGAT	7	378709	378728
		SGF73-for-C	TTGCAGTATGATCACATGAAT	7	377738	377758
		SGF73-rev-D	TGTTCGCAGATTCCATAGAT	7	378157	378176
		SGF73-for-E	TGCGATCCATTCTCGTGTAG	7	378838	378857
		SGF73-rev-F	CTACACGAGAATGGATCGCA	7	378838	378857
		YIL169c- rev	CTCTGTGGTATCAAGTTCCT	9	25971	25990
		YIL169c- for	AGTAATGGAACTCAAGGAAT	9	25249	25268
